# Supplementary material
Source: PubMed Central journal article supplement (PMC5889661)
Supplement: pnas.201720945SI.pdf [file pnas.201720945SI.pdf]

# Supporting Information

Guo et al. 10.1073/pnas.1720945115

## SI Methods

**Fly Strains.** The following stocks were used in this study: *w<sup>1118</sup>* (used as WT), *yw*, *ap-Gal4*, *dome-Gal4*, *UAS-2xEYFP* (6), *xio* RNAi [GD35212; Vienna Drosophila Resource Center (VDRC)], *xio* RNAi (KK110253; VDRC), *Sxl<sup>7BO</sup>*, *da<sup>2</sup>* (24), *actin-Cas9* [54590; Bloomington Drosophila Stock Center (Bloomington)], *U6-xio-sgRNA* (68063; Bloomington), *Mettl3<sup>SK2</sup>* (12), *Df(3R)Exel6197* (*Mettl3* deficiency, 7676; Bloomington), *Ubi-mRFP*, *hsFlp FRT19A* (31418; Bloomington), *xio<sup>A</sup> FRT19A* (57081; Bloomington), and *xio<sup>C</sup> FRT19A* (57082; Bloomington). Resequencing of these two alleles showed that *xio<sup>A</sup>* has a frameshift mutation at amino acid 782 (Fig. S4A) and that *xio<sup>C</sup>* has a point mutation that results in a truncated protein at amino acid 729 (Fig. S4B). Xio antibody staining was strongly reduced in these clones although the epitope is not supposed to be truncated in these mutations.

To generate mutant clones in discs, *xio<sup>A</sup> FRT19A* and *xio<sup>C</sup> FRT19A* females were crossed to *Ubi-mRFP*, *hsFlp FRT19A* males. Progeny were heat-shocked at 37 °C for 1 h twice at first- and second-instar larval stage. To generate mutant clones in ovaries, progeny were heat-shocked at 37 °C for 2 h twice at the end of third-instar larvae. To test flight ability, cohorts of 10 flies were tapped down into a Petri dish, and the number of flies that flew away within 2 min was recorded.

**Antibody Stainings in Discs and Ovaries.** Larval wing discs and female ovaries were stained as previously described (6). Briefly, tissues were dissected in PBS and fixed in 4% formaldehyde in PBST (PBS + 0.1% Triton X-100). After blocking in 1% normal donkey serum in PBST for 1 h, the samples were incubated with the primary antibody in the same solution at 4 °C overnight. After three washes in PBST, samples were incubated with the secondary antibody for 2 h at room temperature, washed in PBST three times, and subsequently mounted in Antifade Mounting Medium (Beyotime). All images were taken on a Zeiss LSM 880 microscope.

The following antibodies were used: mouse anti-Sxl (1:10) [M18; Developmental Studies Hybridoma Bank (DSHB)], mouse anti-Fl(2)d (1:10) (9G2; DSHB), rabbit anti-Xio (1:200), Alexa 488-conjugated (1:1,000) (ThermoFisher) or Cy3-conjugated (1:400) (Jackson Immuno) secondary antibodies, and DAPI (1:1,000) (Beyotime). Xio antibody was generated in rabbits against a peptide containing amino acids 486 to 500 (TEDTLYPDERERLR) and affinity-purified at Youke Biotech.

Adult legs were mounted in a 1:1 (vol/vol) mixture of Permount (Fisher Scientific) and xylene. The genitalia images were taken in stacks and rendered with HeliconFocus software.

**Cell Culture and RNA Interference.** *Drosophila* S2 and Kc cells were maintained in Schneider's medium (Gibco) supplemented with 10% FBS (Sigma) and 1% penicillin-streptomycin (Sigma). For the RNAi experiments, PCR templates for the dsRNA were prepared using Phusion Hot Start High-Fidelity DNA Polymerase (NEB), and the dsRNA were synthesized using T7 MEGA-script Kit (Invitrogen). dsRNA against GFP was used as a control for all RNAi experiments. S2 and Kc cells were resuspended at a density of 1 to 5 × 10<sup>6</sup> cells per mL in serum-free media, and 1 mL of resuspended cells were plated into wells of a six-well plate, followed by addition of 30 µg of dsRNA per well and incubated with dsRNA for 30 min. Subsequently, 3 mL of complete media with 10% FBS was added to each well. After 72 h of incubation at 25 °C, cells were harvested for analysis. The amplicons used for *xio* are DRSC25501 and DRSC35494.

**Coimmunoprecipitation.** To generate the GFP-, mRFP-, or HA-tagged plasmids, full-length cDNAs for Xio (GH14795), Nito (GH11110), Fl(2)d (LD21616), METTL3 (AT20169), METTL14 (LD06016), and SNF (LD45302) were cloned into the pENTR vector (Invitrogen) and transferred into the *Drosophila* gateway vector pAGW, pARW, and pAHW. Sxl-HA was from ref. 6. GFP was cloned into pAWM as a control.

One microgram of total DNA was transfected into S2 cells in a single well of six-well plates with Effectene (QIAGEN). After 48 h, cells were lysed in IP lysis buffer [50 mM Tris (pH 7.4), 150 mM NaCl, 1% Nonidet P-40, 1× protease inhibitor; Beyotime] on ice for 30 min and cleared at 20,000 × g for 10 min at 4 °C. Supernatants were incubated with anti-GFP nanobody agarose beads (Allele Biotechnology) for 2 h at 4 °C. The beads were washed three to four times with 1 mL of lysis buffer and resuspended in 2× SDS sample buffer. Eluted proteins were detected by Western blotting using anti-GFP antibody (A6455; Molecular Probes) or anti-HA antibody (3F10; Roche). For colocalization, S2 cells were grown on Lab-Tek chamber slides and imaged in live conditions 2 d after transfection.

**RT-PCR.** Total RNAs were extracted using TRIzol (Invitrogen) and purified through the RNeasy Mini Kit (QIAGEN). cDNA was generated from 1 µg of purified RNA using the iScript cDNA Synthesis Kit (Bio-Rad). TaKaRa Taq was used for the PCR. Sxl primers (GTGGTTATCCCCCATATGGC and GATGGCAGAGAATGGGAC) and PCR conditions are described in ref. 24.

**Analyzing m<sup>6</sup>A Levels by LC-MS.** Total RNAs were extracted from *yw* and *xio<sup>A</sup>* pharate pupae or dsRNA-treated Kc cells and then subjected to one round of polyA selection using the GenElute mRNA Miniprep kit (Sigma). Before LC-MS analysis, all RNA samples were hydrolyzed enzymatically to ribonucleosides. Briefly, 10 µg of RNA of each sample was digested by nuclease P1 (Sigma) and snake venom phosphodiesterase (Sigma) at 37 °C for 2 h and followed by digestion with fast alkaline phosphatase (ThermoFisher) for another 1 h. Then, the digested samples were used for the following LC-MS analysis.

Quantitative LC-MS analyses of m<sup>6</sup>A and adenosine were achieved using a Waters UPLC coupled to a Thermo Q Exactive mass spectrometer in positive ion mode using dynamic multiple reaction monitoring. The ribonucleosides in the hydrolyzed RNA samples were resolved on an Acquity UPLC HSS T3 column (1.8-µm particle size, 100-Å pore size, 2.1 mm × 50 mm, 25 °C) at 300 µL·min<sup>-1</sup> using a solvent system of 0.1% formic acid in H<sub>2</sub>O (A) and acetonitrile (B). The elution profile was 2% B for 2 min, 2 to 11% B over 4 min, then to 11 to 80% B over 4 min, followed by a column washing at 80% B and column equilibration. The operating parameters for the mass spectrometer were as follows: gas temperature 350 °C; gas flow 35 L per min. The quantification of a ribonucleoside can be achieved using *m/z* of the parent ribonucleoside ion and *m/z* of the deglycosylated ion product. Nucleosides were quantified based on the transition of the parent ribonucleoside to the deglycosylated base ion: *m/z* 282.1 to 150.1 for m<sup>6</sup>A and *m/z* 268.1 to 136.1 for A. Absolute quantities of each ribonucleoside were determined using an external calibration curve prepared with A standards (Sigma) and m<sup>6</sup>A standards (Selleck).

**RNA-Seq and Analysis of Differential Gene Expression and Alternative Splicing.** Total RNA was extracted from *xio* mutants and *w<sup>1118</sup>* control pupae using TRIzol (Invitrogen) and purified through an RNeasy Mini Kit (Qiagen). It was then used to prepare stranded





A

modENCODE Developmental  
Timecourse Data

modENCODE Tissue  
Expression Data

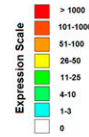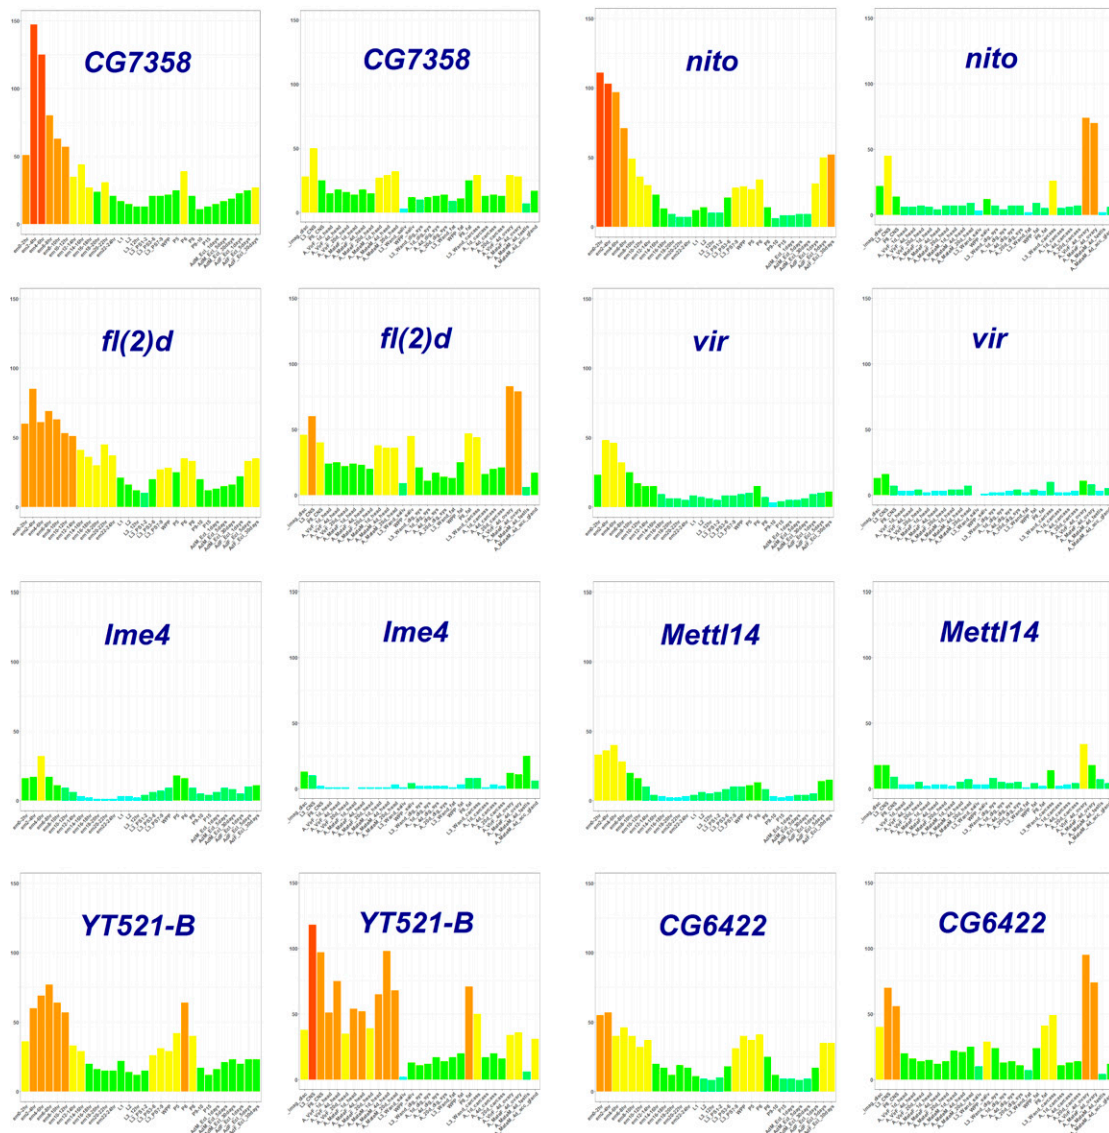

B

FlyExpress CG7358 in situ data

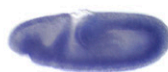

Stage 9-10

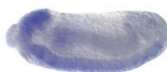

Stage 13-16

**Fig. 53.** Expression of *xio* and other m6A factors across modENCODE data and in situ hybridization of *xio* from FlyExpress data. (A) RPKM (reads per kilobase per million mapped reads) measurements of *xio* and other m6A factors from modENCODE developmental time course and tissue expression dataset. (B) RNA in situ hybridization of *xio* in stage 9 to 10 and 13 to 16 embryos. Adapted with permission from ref. 1.

1. Tomancak P, et al. (2007) Global analysis of patterns of gene expression during *Drosophila* embryogenesis. *Genome Biol* 8:R145.



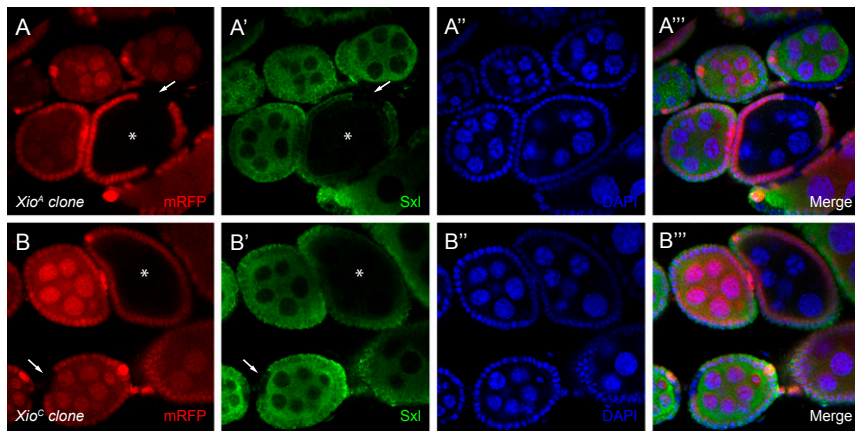

**Fig. S5.** *xio* mutant germline and follicle cell clones show reduced Sxl levels. Ovaries containing *xio*<sup>A</sup> (A–A''') or *xio*<sup>C</sup> (B–B''') mutant germline clones (asterisks) and follicle cell clones (arrows) were stained for Sxl and DAPI. Clones were marked by the absence of mRFP expression.









**Dataset S2. Differential gene expression analysis in *xio* mutant**

[Dataset S2](#)

**Dataset S3. Alternative splicing analysis in *xio* mutant**

[Dataset S3](#)
